# Supplementary material
Source: PubMed Central journal article supplement (PMC6348050)

**Figure S1. Forest plot of mean difference of hemoglobin at (A) eGFR 30 vs. 50 ml/min/1.73m<sup>2</sup> at stage A1 in CKD cohorts and (B) eGFR 50 vs. 80 ml/min/1.73m<sup>2</sup> at stage A1 in general population and high risk cohorts**

**A**

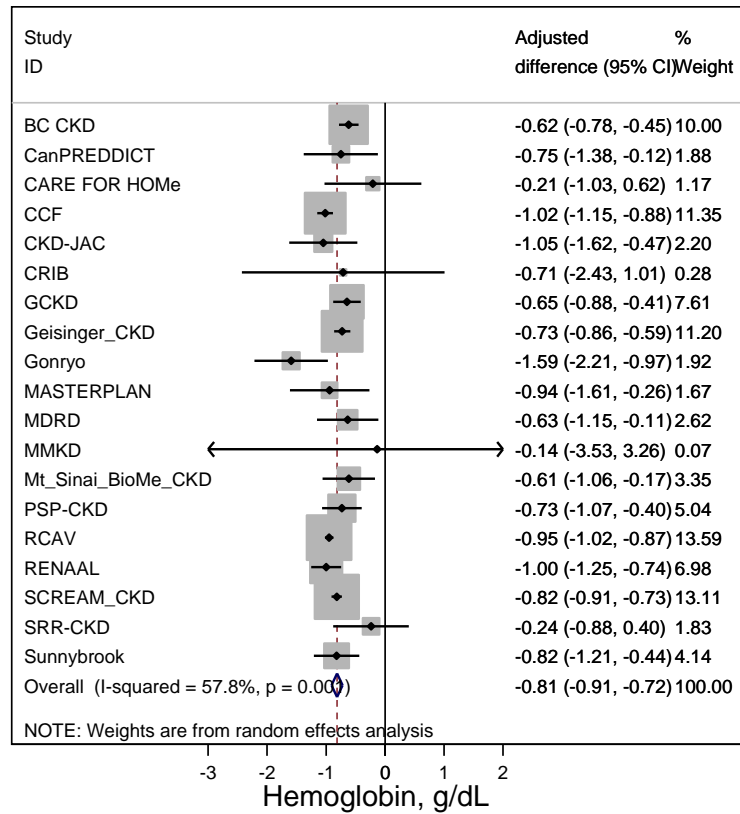

**B**

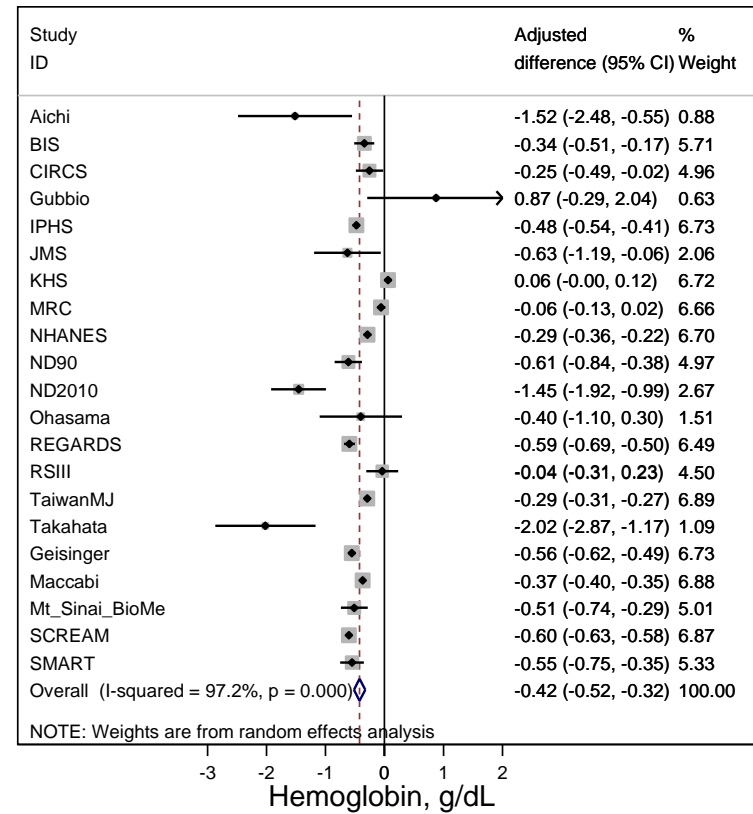

Supplement: NIHMS1506109-supplement-1.pdf [file NIHMS1506109-supplement-1.pdf]
