# Supplementary material
Source: PubMed Central journal article supplement (PMC6348050)

**Figure S7. Association between eGFR and hemoglobin by albuminuria stages in CKD cohorts excluding users of iron supplementation and erythropoietin stimulating agents.**

Y axis depicts the meta-analyzed adjusted difference from mean value at eGFR 50 ml/min/1.73m<sup>2</sup> and albuminuria <30 mg/g.

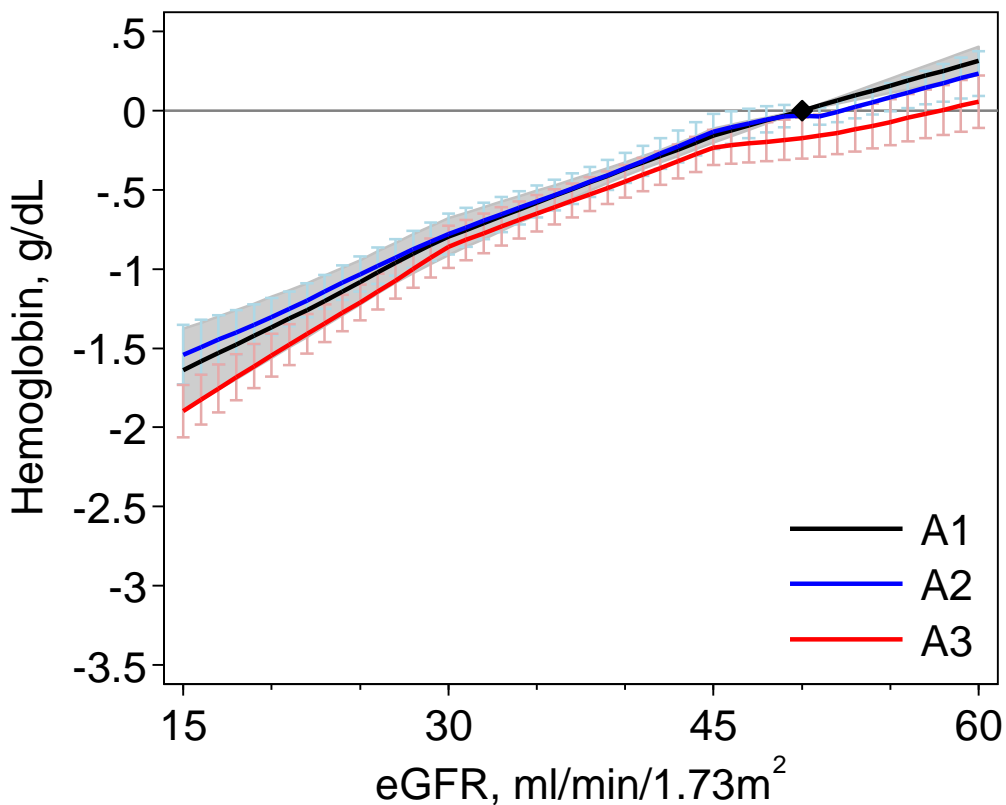

Supplement: NIHMS1506109-supplement-7.pdf [file NIHMS1506109-supplement-7.pdf]
