# Supplementary material
Source: PubMed Central journal article supplement (PMC6348050)

**Figure S9. Association between eGFR and continuous laboratory measures (A) hemoglobin, (B) potassium, (C) bicarbonate, (D) parathyroid hormone, (E) phosphorus, (F) calcium, by diabetes status in CKD cohorts.**

Y-axis depicts the meta-analyzed adjusted difference from mean value at eGFR 50 ml/min/1.73m<sup>2</sup> and non-diabetics. Individuals with diabetes vs those without diabetes had the following difference: hemoglobin -0.43 (-0.57 to -0.28), potassium 0.10 (0.04 to 0.15), bicarbonate -0.32 (-0.51 to -0.13), parathyroid hormone -1.11 (-3.28 to 1.06), phosphorus 0.09 (0.04 to 0.13), and calcium 0.03 (0.01 to 0.05).

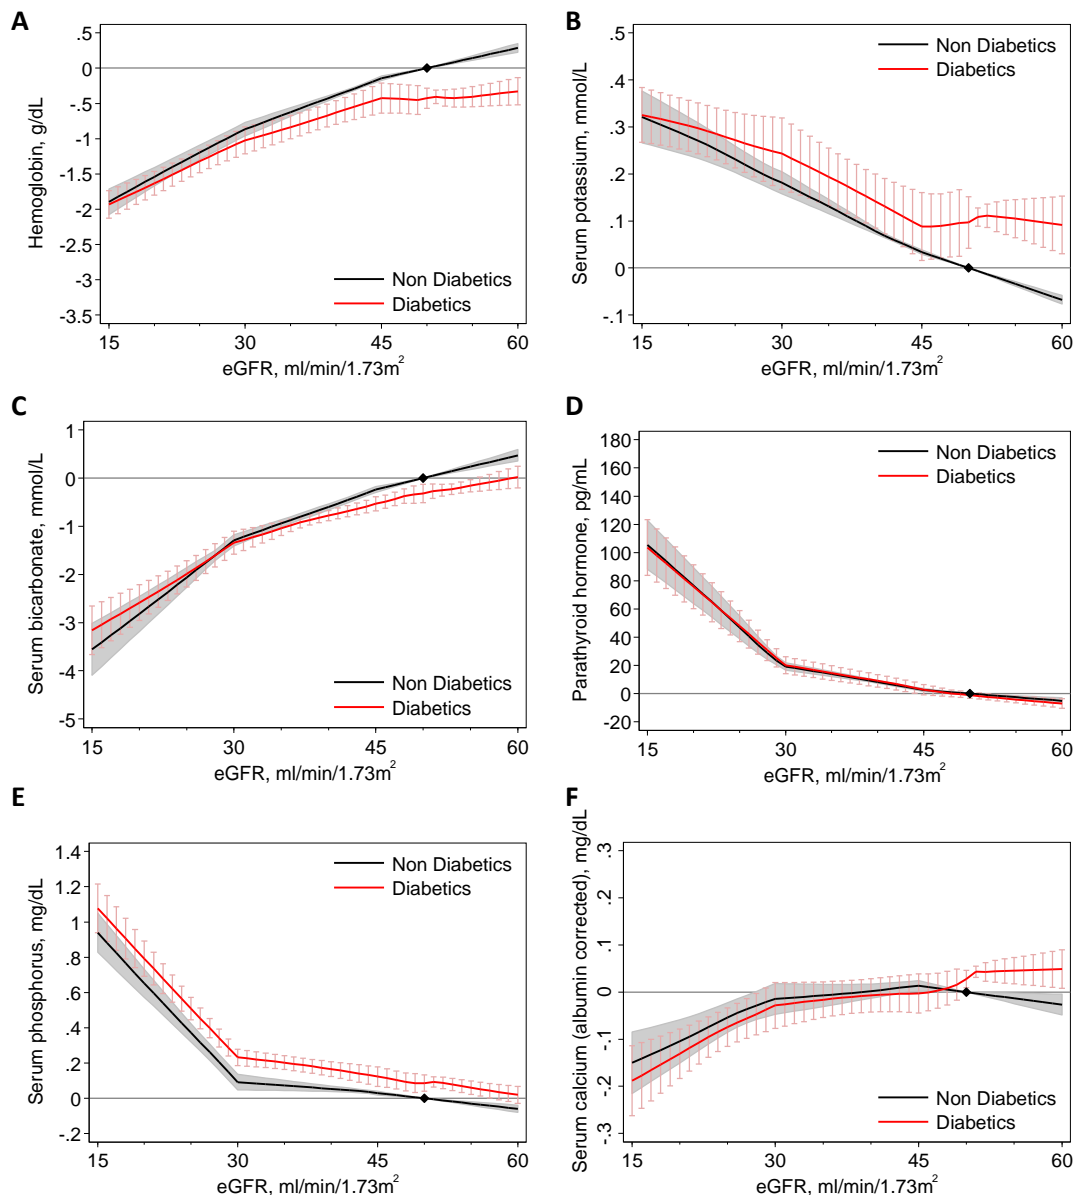

Supplement: NIHMS1506109-supplement-9.pdf [file NIHMS1506109-supplement-9.pdf]
