# Supplementary material
Source: PubMed Central journal article supplement (PMC6348050)

**Figure S10. Association between eGFR and continuous laboratory measures (A) hemoglobin, (B) potassium, (C) bicarbonate, (D) parathyroid hormone, (E) phosphorus, (F) calcium, by diabetes status in general population and high risk cohorts.**

Y-axis depicts the meta-analyzed adjusted difference from mean value at eGFR 80 ml/min/1.73m<sup>2</sup> and non-diabetics. Individuals with diabetes vs those without diabetes had the following difference: hemoglobin -0.09 (-0.24 to 0.06), potassium 0.07 (0.05 to 0.09), bicarbonate -0.31 (-0.49 to -0.13), parathyroid hormone -5.77 (-8.59 to -2.95), phosphorus 0.06 (0.02 to 0.10), and calcium 0.08 (0.06 to 0.10).

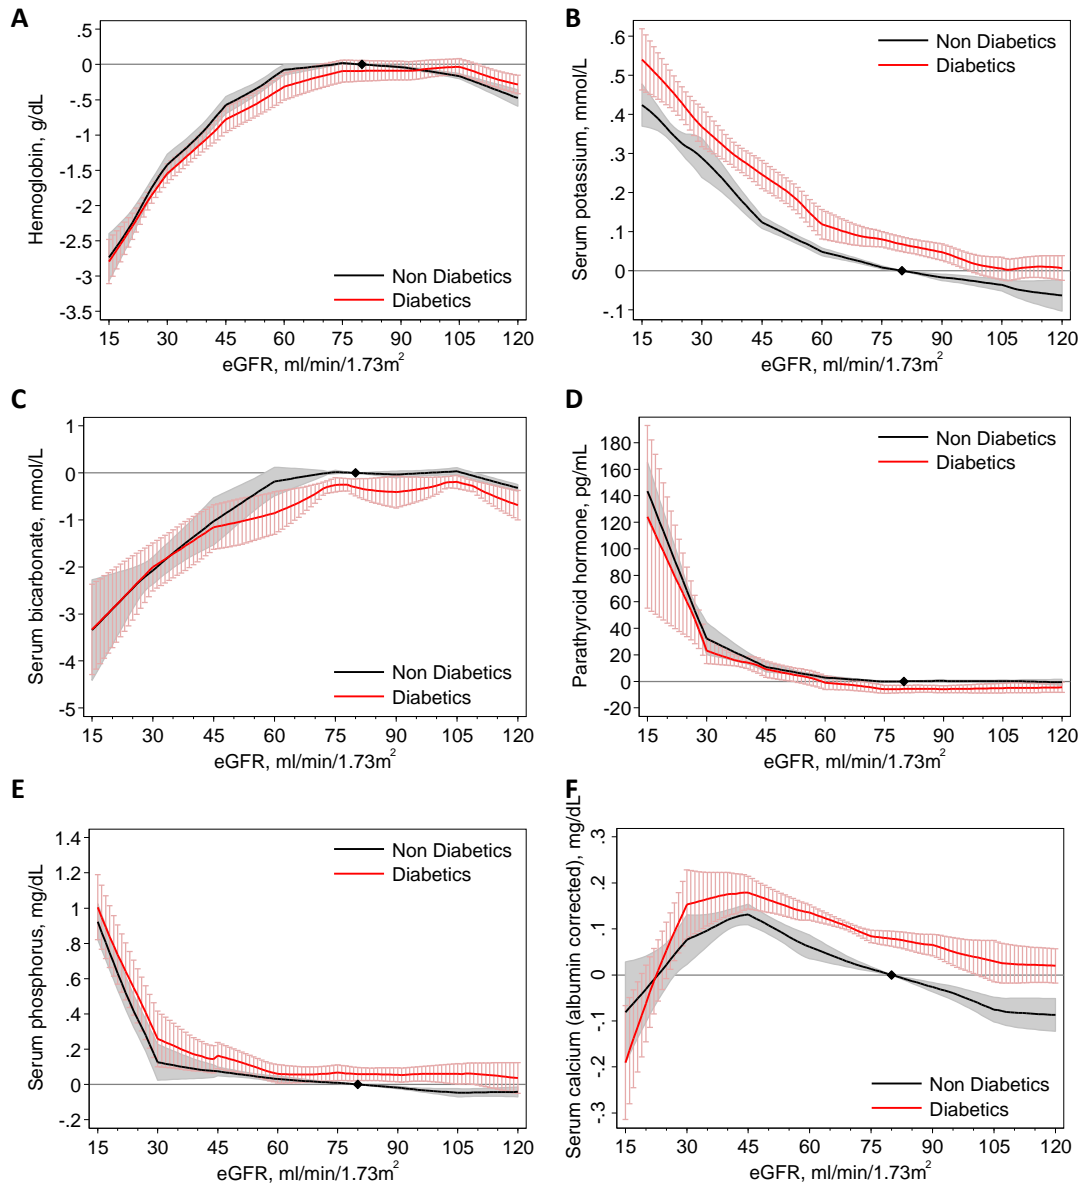

Supplement: NIHMS1506109-supplement-10.pdf [file NIHMS1506109-supplement-10.pdf]
