# Supplementary material
Source: PubMed Central journal article supplement (PMC6348050)

**Figure S12. Association between eGFR and continuous laboratory measures (A) hemoglobin, (B) potassium, (C) bicarbonate, (D) parathyroid hormone, (E) phosphorus, (F) calcium, by age in general population and high risk cohorts.**

Y-axis depicts the meta-analyzed adjusted difference from mean value at eGFR 80 ml/min/1.73m<sup>2</sup> and Age≥55.

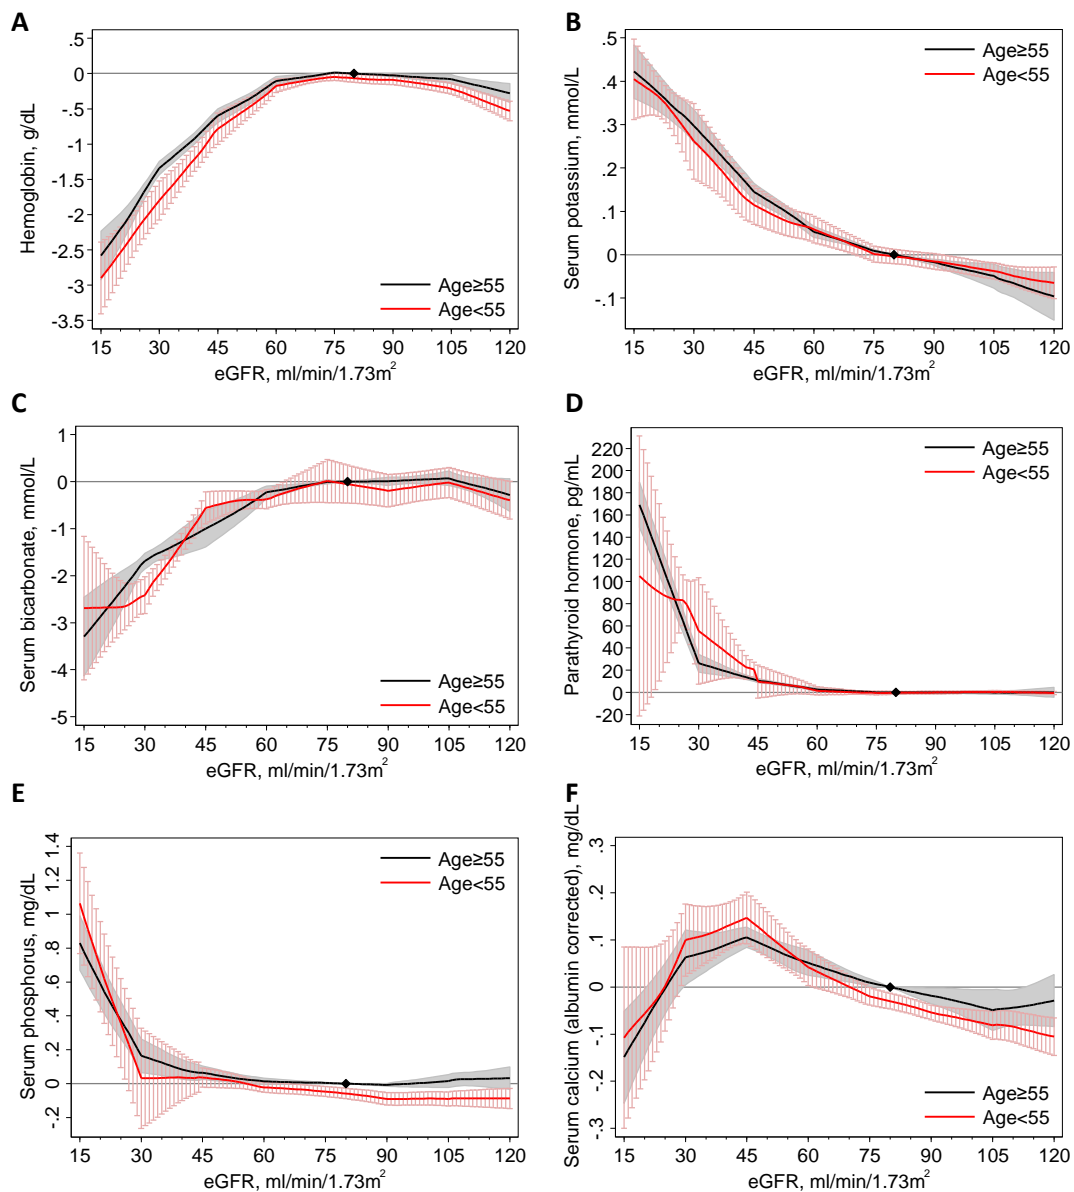

Supplement: NIHMS1506109-supplement-12.pdf [file NIHMS1506109-supplement-12.pdf]
