# Supplementary material
Source: PubMed Central journal article supplement (PMC6348050)

**Figure S15. Association between eGFR and continuous laboratory measures (A) hemoglobin, (B) potassium, (C) bicarbonate, (D) parathyroid hormone, (E) phosphorus, (F) calcium, by age and sex in CKD cohorts.**

Y-axis depicts the meta-analyzed adjusted difference from mean value at eGFR 50 ml/min/1.73m<sup>2</sup> and Age≥55 and male.

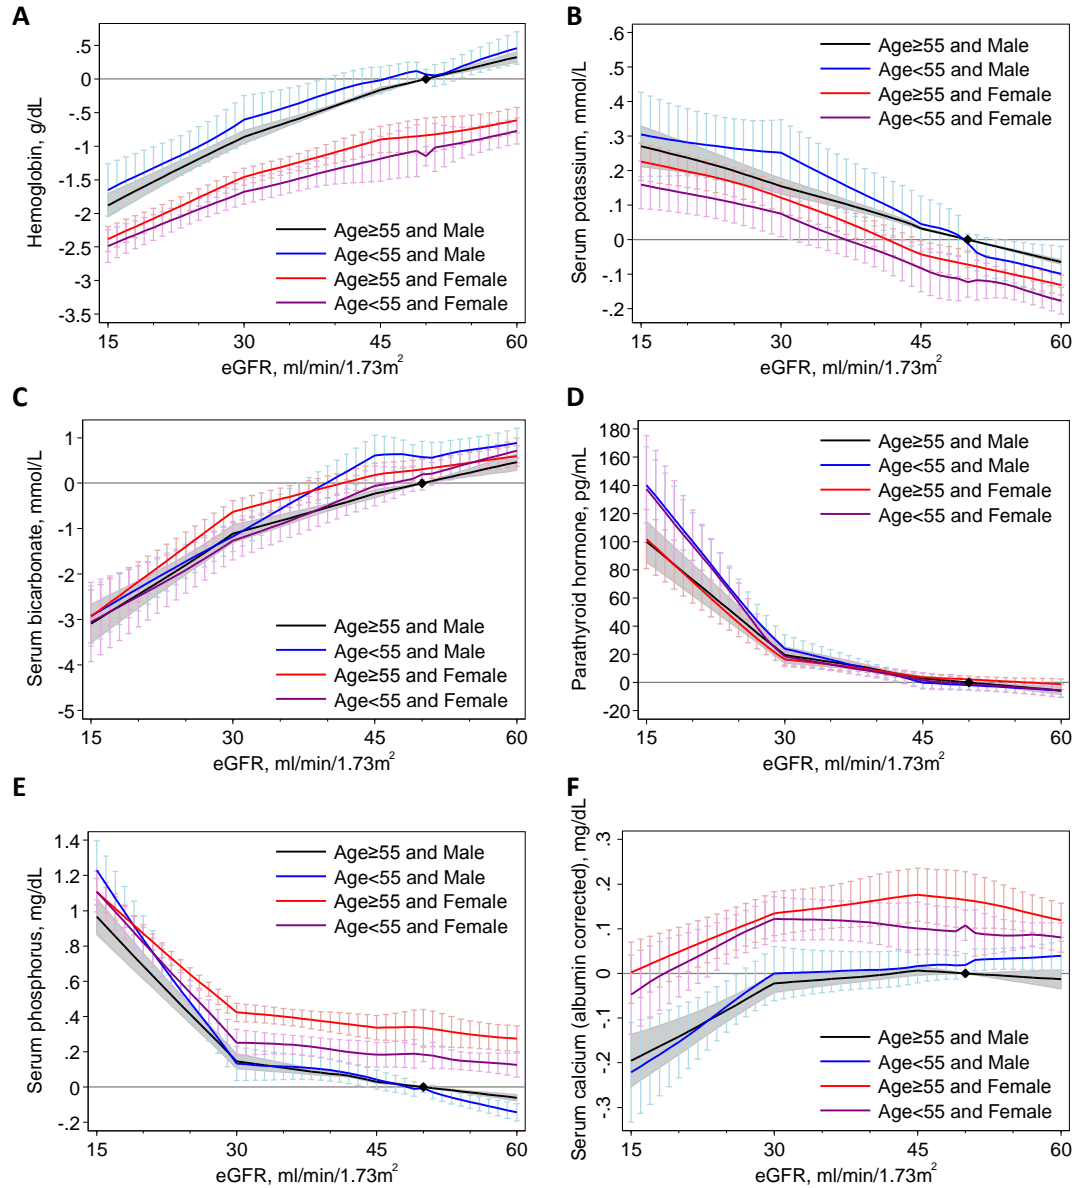

Supplement: NIHMS1506109-supplement-15.pdf [file NIHMS1506109-supplement-15.pdf]
