# Supplementary material
Source: PubMed Central journal article supplement (PMC6348050)

**Figure S16. Association between eGFR and continuous laboratory measures (A) hemoglobin, (B) potassium, (C) bicarbonate, (D) parathyroid hormone, (E) phosphorus, (F) calcium, by age and sex in general population and high risk cohorts.**

Y-axis depicts the meta-analyzed adjusted difference from mean value at eGFR 80 ml/min/1.73m<sup>2</sup> and Age≥55 and male.

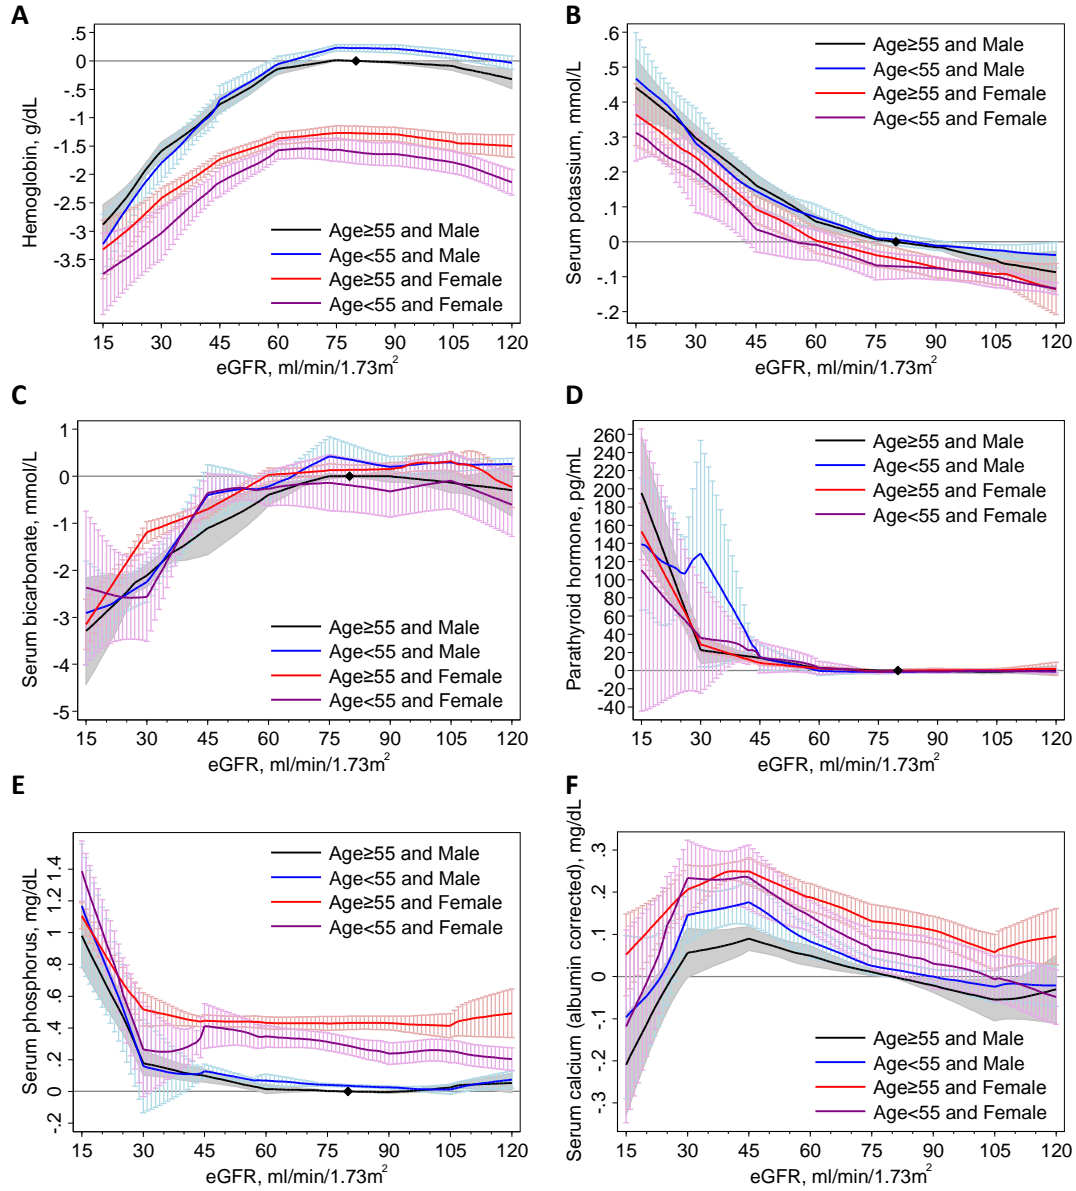

Supplement: NIHMS1506109-supplement-16.pdf [file NIHMS1506109-supplement-16.pdf]
