# Supplementary material
Source: PubMed Central journal article supplement (PMC6348050)

**Figure S18. Association between eGFR and continuous laboratory measures (A) hemoglobin, (B) potassium, (C) bicarbonate, (D) parathyroid hormone, (E) phosphorus, (F) calcium, by race in general population and high risk cohorts.**

Y-axis depicts the meta-analyzed adjusted difference from mean value at eGFR 80 ml/min/1.73m<sup>2</sup> and non-blacks.

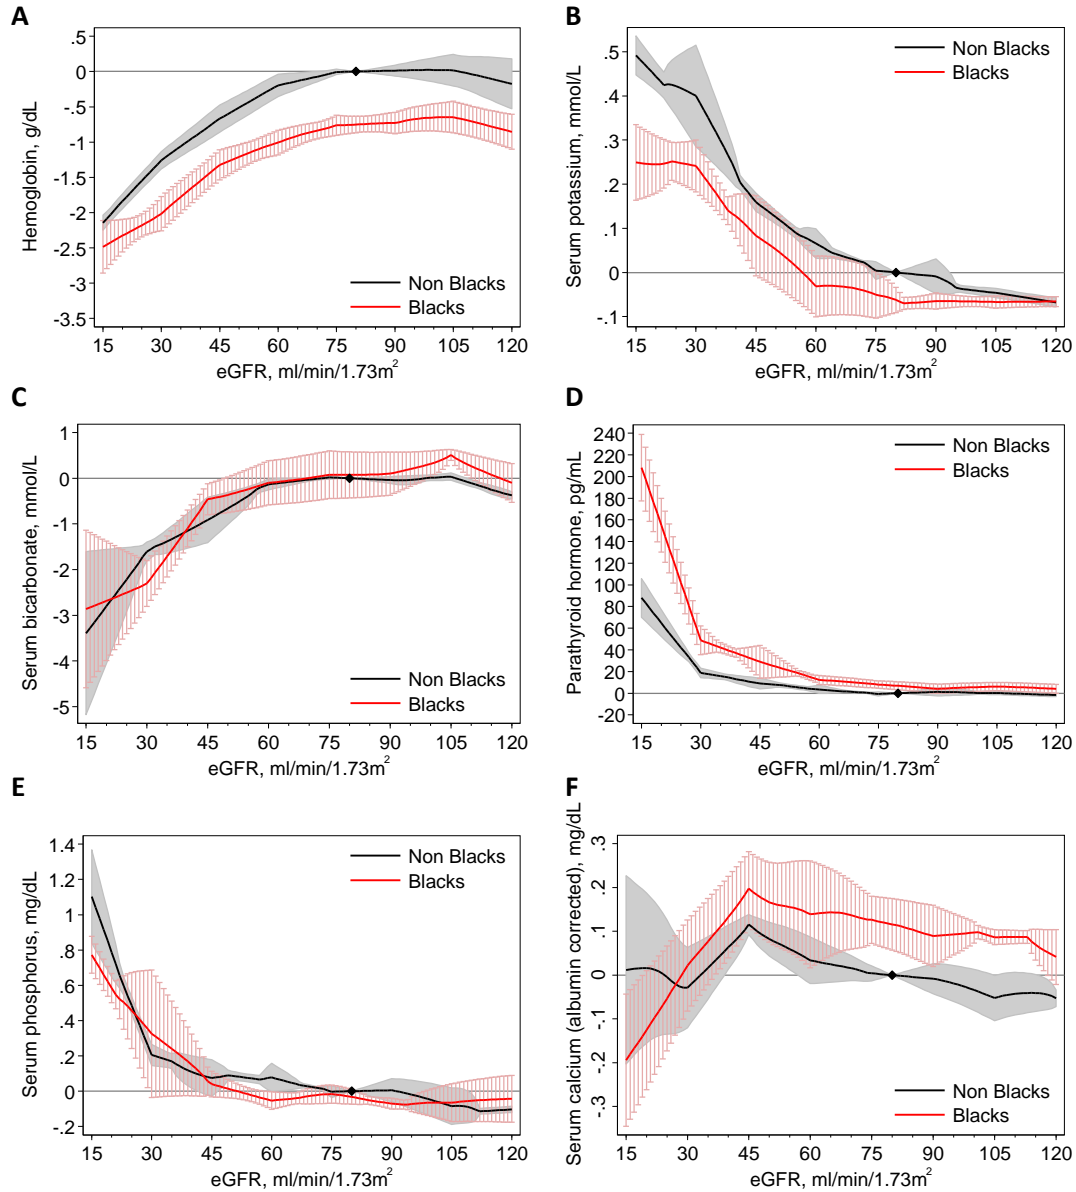

Supplement: NIHMS1506109-supplement-18.pdf [file NIHMS1506109-supplement-18.pdf]
