# Supplementary material
Source: PubMed Central journal article supplement (PMC6348050)
Supplement: NIHMS1506109-supplement-19.pdf [file NIHMS1506109-supplement-19.pdf]

**Figure S19. Odds ratios of laboratory abnormalities in CKD (top panels) and general population and high risk cohorts (bottom panels)**

Chronic Kidney Disease

| Anemia |                          |                          |                          | Hyperkalemia |                          |                          |                          | Acidosis |                          |                           |                           |
|--------|--------------------------|--------------------------|--------------------------|--------------|--------------------------|--------------------------|--------------------------|----------|--------------------------|---------------------------|---------------------------|
| eGFR   | A1                       | A2                       | A3                       | eGFR         | A1                       | A2                       | A3                       | eGFR     | A1                       | A2                        | A3                        |
| >90    |                          |                          |                          | >90          |                          |                          |                          | >90      |                          |                           |                           |
| 75-89  |                          |                          |                          | 75-89        |                          |                          |                          | 75-89    |                          |                           |                           |
| 60-74  | <b>0.66 (0.58, 0.74)</b> | <b>0.76 (0.59, 0.98)</b> | <b>1.03 (0.82, 1.29)</b> | 60-74        | <b>0.61 (0.58, 0.64)</b> | <b>0.84 (0.69, 1.03)</b> | <b>1.01 (0.73, 1.39)</b> | 60-74    | <b>0.72 (0.67, 0.77)</b> | <b>1.20 (0.98, 1.47)</b>  | <b>1.07 (0.76, 1.51)</b>  |
| 45-59  | <b>1.00 (Ref)</b>        | <b>1.11 (0.99, 1.25)</b> | <b>1.43 (1.17, 1.76)</b> | 45-59        | <b>1.00 (Ref)</b>        | <b>1.12 (1.00, 1.26)</b> | <b>1.30 (1.07, 1.58)</b> | 45-59    | <b>1.00 (Ref)</b>        | <b>1.53 (1.16, 2.01)</b>  | <b>1.73 (1.24, 2.41)</b>  |
| 20-44  | <b>2.10 (1.98, 2.23)</b> | <b>2.08 (1.85, 2.35)</b> | <b>2.36 (2.13, 2.62)</b> | 20-44        | <b>1.82 (1.60, 2.09)</b> | <b>2.31 (1.94, 2.75)</b> | <b>2.32 (2.04, 2.63)</b> | 20-44    | <b>2.11 (1.97, 2.27)</b> | <b>3.25 (2.76, 3.84)</b>  | <b>2.94 (2.36, 3.67)</b>  |
| 15-29  | <b>5.09 (4.41, 5.87)</b> | <b>4.94 (4.18, 5.83)</b> | <b>6.34 (5.49, 7.31)</b> | 15-29        | <b>3.49 (2.99, 4.07)</b> | <b>3.49 (2.83, 4.31)</b> | <b>3.69 (3.01, 4.52)</b> | 15-29    | <b>5.78 (4.46, 7.50)</b> | <b>8.09 (5.83, 11.21)</b> | <b>8.37 (6.48, 10.83)</b> |

  

| Hyperparathyroidism |                          |                          |                            | Hyperphosphatemia |                           |                           |                            | Hypocalcemia |                          |                          |                          |
|---------------------|--------------------------|--------------------------|----------------------------|-------------------|---------------------------|---------------------------|----------------------------|--------------|--------------------------|--------------------------|--------------------------|
| eGFR                | A1                       | A2                       | A3                         | eGFR              | A1                        | A2                        | A3                         | eGFR         | A1                       | A2                       | A3                       |
| >90                 |                          |                          |                            | >90               |                           |                           |                            | >90          |                          |                          |                          |
| 75-89               |                          |                          |                            | 75-89             |                           |                           |                            | 75-89        |                          |                          |                          |
| 60-74               | <b>0.62 (0.50, 0.77)</b> | <b>0.81 (0.66, 0.99)</b> | <b>0.63 (0.52, 0.78)</b>   | 60-74             | <b>0.80 (0.69, 0.93)</b>  | <b>1.04 (0.55, 1.95)</b>  | <b>1.24 (0.91, 1.69)</b>   | 60-74        | <b>0.95 (0.73, 1.23)</b> | <b>1.00 (0.62, 1.63)</b> | <b>0.83 (0.63, 1.08)</b> |
| 45-59               | <b>1.00 (Ref)</b>        | <b>1.11 (0.99, 1.24)</b> | <b>1.26 (0.98, 1.62)</b>   | 45-59             | <b>1.00 (Ref)</b>         | <b>1.06 (0.99, 1.13)</b>  | <b>1.64 (1.14, 2.36)</b>   | 45-59        | <b>1.00 (Ref)</b>        | <b>1.14 (0.88, 1.46)</b> | <b>0.87 (0.68, 1.10)</b> |
| 20-44               | <b>2.44 (2.06, 2.88)</b> | <b>2.90 (2.27, 3.71)</b> | <b>3.23 (2.67, 3.92)</b>   | 20-44             | <b>1.72 (1.48, 2.01)</b>  | <b>1.78 (1.48, 2.13)</b>  | <b>2.40 (2.05, 2.80)</b>   | 20-44        | <b>1.40 (1.22, 1.60)</b> | <b>1.58 (1.11, 2.26)</b> | <b>1.12 (0.81, 1.54)</b> |
| 15-29               | <b>4.39 (3.35, 5.75)</b> | <b>6.44 (4.92, 8.43)</b> | <b>10.15 (7.67, 13.45)</b> | 15-29             | <b>8.46 (6.83, 10.49)</b> | <b>7.61 (5.44, 10.65)</b> | <b>10.89 (8.10, 14.65)</b> | 15-29        | <b>3.34 (2.72, 4.10)</b> | <b>3.86 (2.79, 5.34)</b> | <b>3.16 (2.31, 4.32)</b> |

General Population and High Risk

| Anemia |                          |                           |                            | Hyperkalemia |                          |                          |                          | Acidosis |                          |                           |                          |
|--------|--------------------------|---------------------------|----------------------------|--------------|--------------------------|--------------------------|--------------------------|----------|--------------------------|---------------------------|--------------------------|
| eGFR   | A1                       | A2                        | A3                         | eGFR         | A1                       | A2                       | A3                       | eGFR     | A1                       | A2                        | A3                       |
| >90    | <b>0.47 (0.38, 0.57)</b> | <b>0.57 (0.47, 0.69)</b>  | <b>0.80 (0.69, 0.92)</b>   | >90          | <b>0.26 (0.17, 0.38)</b> | <b>0.36 (0.26, 0.50)</b> | <b>0.35 (0.23, 0.53)</b> | >90      | <b>0.46 (0.33, 0.65)</b> | <b>0.58 (0.38, 0.89)</b>  | <b>0.34 (0.20, 0.58)</b> |
| 75-89  | <b>0.43 (0.37, 0.51)</b> | <b>0.62 (0.54, 0.71)</b>  | <b>0.88 (0.74, 1.04)</b>   | 75-89        | <b>0.34 (0.24, 0.47)</b> | <b>0.48 (0.38, 0.61)</b> | <b>0.43 (0.31, 0.59)</b> | 75-89    | <b>0.55 (0.44, 0.68)</b> | <b>0.62 (0.33, 1.17)</b>  | <b>0.56 (0.36, 0.88)</b> |
| 60-74  | <b>0.55 (0.51, 0.61)</b> | <b>0.83 (0.75, 0.92)</b>  | <b>1.12 (0.97, 1.29)</b>   | 60-74        | <b>0.51 (0.41, 0.65)</b> | <b>0.68 (0.50, 0.91)</b> | <b>0.81 (0.65, 1.01)</b> | 60-74    | <b>0.66 (0.56, 0.77)</b> | <b>0.79 (0.62, 0.99)</b>  | <b>1.09 (0.79, 1.49)</b> |
| 45-59  | <b>1.00 (Ref)</b>        | <b>1.34 (1.23, 1.47)</b>  | <b>1.93 (1.66, 2.26)</b>   | 45-59        | <b>1.00 (Ref)</b>        | <b>1.09 (0.92, 1.28)</b> | <b>1.38 (1.04, 1.83)</b> | 45-59    | <b>1.00 (Ref)</b>        | <b>1.44 (1.15, 1.81)</b>  | <b>1.82 (1.45, 2.27)</b> |
| 20-44  | <b>2.26 (1.99, 2.57)</b> | <b>2.74 (2.31, 3.25)</b>  | <b>4.00 (3.21, 4.99)</b>   | 20-44        | <b>1.94 (1.46, 2.58)</b> | <b>2.30 (1.85, 2.86)</b> | <b>2.46 (1.91, 3.16)</b> | 20-44    | <b>2.15 (1.83, 2.52)</b> | <b>3.43 (2.78, 4.25)</b>  | <b>3.12 (2.59, 3.75)</b> |
| 15-29  | <b>6.94 (4.83, 9.98)</b> | <b>8.22 (5.61, 12.04)</b> | <b>12.54 (8.29, 18.99)</b> | 15-29        | <b>3.91 (2.46, 6.20)</b> | <b>4.33 (3.17, 5.92)</b> | <b>5.42 (3.75, 7.82)</b> | 15-29    | <b>4.11 (3.26, 5.18)</b> | <b>7.05 (4.64, 10.72)</b> | <b>7.13 (5.16, 9.86)</b> |

  

| Hyperparathyroidism |                          |                            |                             | Hyperphosphatemia |                          |                          |                           | Hypocalcemia |                          |                          |                          |
|---------------------|--------------------------|----------------------------|-----------------------------|-------------------|--------------------------|--------------------------|---------------------------|--------------|--------------------------|--------------------------|--------------------------|
| eGFR                | A1                       | A2                         | A3                          | eGFR              | A1                       | A2                       | A3                        | eGFR         | A1                       | A2                       | A3                       |
| >90                 | <b>0.47 (0.32, 0.71)</b> | <b>0.68 (0.57, 0.80)</b>   | <b>0.76 (0.39, 1.48)</b>    | >90               | <b>0.56 (0.42, 0.75)</b> | <b>0.55 (0.47, 0.64)</b> | <b>0.68 (0.53, 0.87)</b>  | >90          | <b>1.99 (1.10, 3.59)</b> | <b>1.79 (1.04, 3.07)</b> | <b>1.80 (0.88, 3.66)</b> |
| 75-89               | <b>0.46 (0.32, 0.67)</b> | <b>0.66 (0.46, 0.94)</b>   | <b>0.59 (0.31, 1.10)</b>    | 75-89             | <b>0.66 (0.53, 0.81)</b> | <b>0.69 (0.59, 0.80)</b> | <b>0.75 (0.52, 1.09)</b>  | 75-89        | <b>1.45 (1.03, 2.04)</b> | <b>1.22 (0.90, 1.64)</b> | <b>1.11 (0.75, 1.65)</b> |
| 60-74               | <b>0.62 (0.46, 0.84)</b> | <b>0.95 (0.67, 1.35)</b>   | <b>0.88 (0.68, 1.14)</b>    | 60-74             | <b>0.82 (0.70, 0.95)</b> | <b>0.87 (0.74, 1.02)</b> | <b>0.87 (0.56, 1.33)</b>  | 60-74        | <b>1.17 (0.96, 1.43)</b> | <b>1.21 (0.88, 1.67)</b> | <b>0.88 (0.67, 1.15)</b> |
| 45-59               | <b>1.00 (Ref)</b>        | <b>1.46 (1.11, 1.92)</b>   | <b>1.83 (1.48, 2.26)</b>    | 45-59             | <b>1.00 (Ref)</b>        | <b>1.04 (0.86, 1.26)</b> | <b>1.12 (0.81, 1.55)</b>  | 45-59        | <b>1.00 (Ref)</b>        | <b>1.00 (0.80, 1.25)</b> | <b>0.77 (0.60, 0.99)</b> |
| 20-44               | <b>2.11 (1.79, 2.49)</b> | <b>3.07 (1.64, 5.75)</b>   | <b>4.80 (3.87, 5.95)</b>    | 20-44             | <b>1.81 (1.54, 2.12)</b> | <b>1.31 (0.95, 1.82)</b> | <b>1.68 (1.09, 2.60)</b>  | 20-44        | <b>1.05 (0.68, 1.62)</b> | <b>1.48 (0.79, 2.78)</b> | <b>1.12 (0.46, 2.72)</b> |
| 15-29               | <b>5.04 (2.95, 8.62)</b> | <b>11.16 (7.81, 15.96)</b> | <b>21.27 (15.74, 28.74)</b> | 15-29             | <b>6.76 (5.42, 8.42)</b> | <b>4.52 (2.55, 8.00)</b> | <b>6.43 (3.70, 11.18)</b> | 15-29        | <b>2.31 (1.37, 3.92)</b> | <b>3.09 (1.47, 6.47)</b> | <b>2.91 (1.17, 7.25)</b> |

Adjustment was to 60 years old, half male, non-black, 30% diabetes, 20% history of CVD, 40% ever smoker, SPB 130 mmHg, BMI 30kg/m<sup>2</sup>, stage A1, eGFR 50

Bold font indicates statistical significance (p<0.05). Color coding is based on odds ratio quartile within each abnormality.

Definitions of each abnormality are as follows: Anemia: Hgb: male <13 g/dL, female <12 g/dL; Hct: male <39%, female <36%. Hyperkalemia: potassium >5 mmol/L. Acidosis: bicarbonate <22 mmol/L. Hyperparathyroidism: intact PTH >65 pg/mL. Hyperphosphatemia: phosphorus >4.5 mg/dL. Hypocalcemia: corrected calcium <8.5 mg/dL.
