# Supplementary material
Source: PubMed Central journal article supplement (PMC6348050)

**Figure S22. Association between eGFR and hypertension by (A) diabetes, (B) age, (C) sex, (D) age and sex, and (E) race in CKD cohorts**

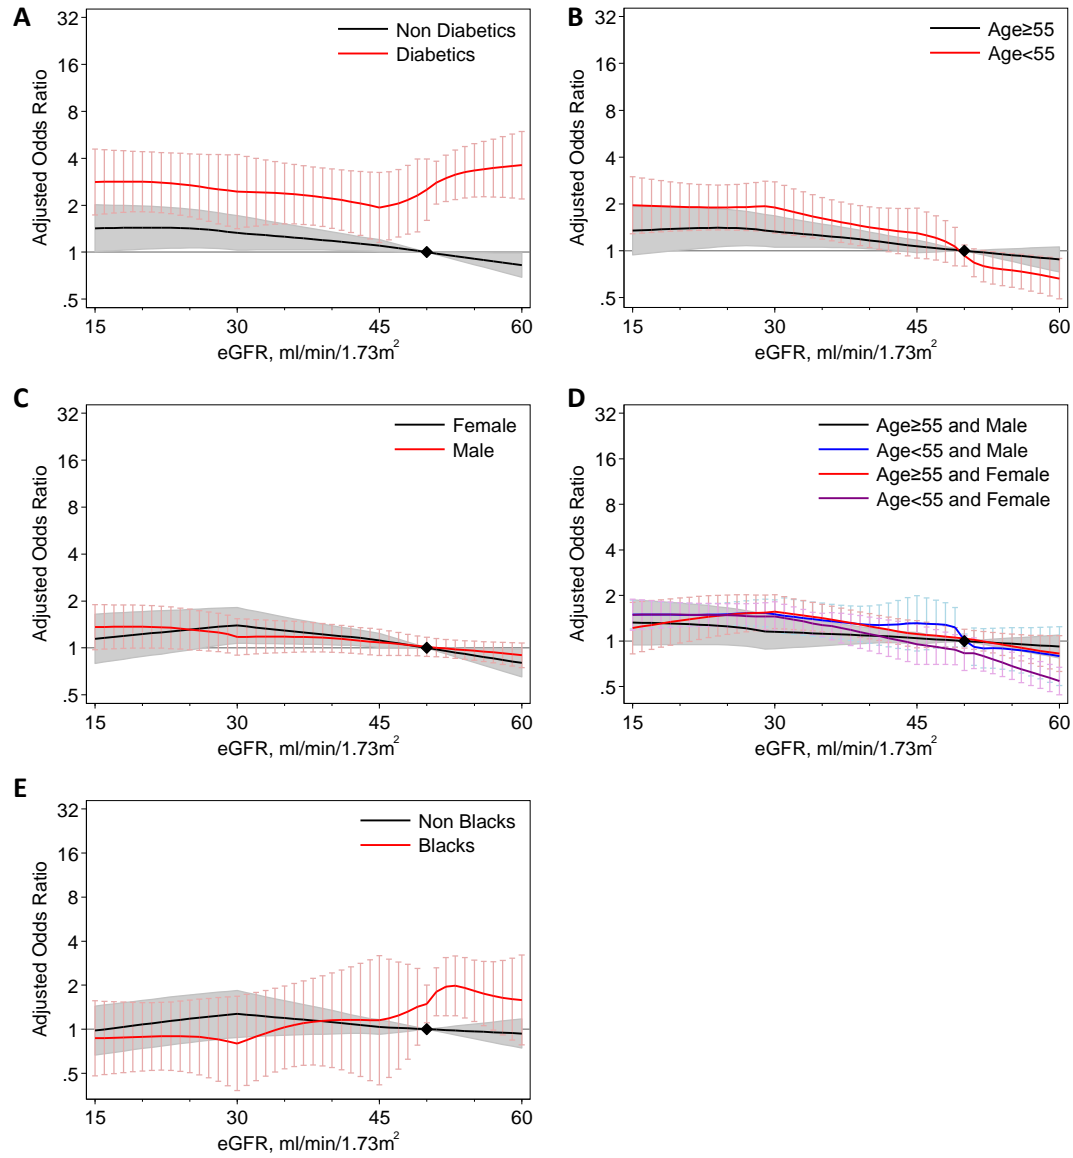

Supplement: NIHMS1506109-supplement-22.pdf [file NIHMS1506109-supplement-22.pdf]
