# Supplementary material
Source: PubMed Central journal article supplement (PMC6348050)
Supplement: NIHMS1506109-supplement-24.pdf [file NIHMS1506109-supplement-24.pdf]

## Item S1. Data analysis overview and analytic notes for some of individual studies

### Overview:

As previously described,<sup>1</sup> the collaborating cohorts were asked to compile a dataset with approximately 40 variables (key exposures [serum creatinine to estimate GFR and albuminuria], covariates [e.g., age, sex, race/ethnicity, diabetes], and outcomes [laboratory tests and hypertension]). To be consistent across cohorts, the CKD-PC Data Coordinating Center sent definitions for those variables to participating cohorts. We instructed studies not to impute any variables.

For 42 of the 55 cohorts in this specific study, the Data Coordination Center at Johns Hopkins University conducted the analysis; the remainder ran the standard code written in STATA by the Data Coordinating Center and shared the output with the Data Coordinating Center. The standard code was designed to automatically save all estimates and variance-covariance matrices needed for the meta-analysis. Then, the Data Coordinating Center meta-analyzed the estimates across cohorts using STATA.

As detailed in our previous reports,<sup>2,3</sup> each cohort was instructed to standardize their serum creatinine and report its method when available. The reported creatinine standardization allows grouping studies into studies that reported using a standard IDMS traceable method or conducted some serum creatinine standardization to IDMS traceable methods (ARIC, AusDiab, BIS, CanPREDDICT, CARE FOR HOME, ESTHER, GCKD, Geisinger, Gonryo, Gubbio, Maccabi, MASTERPLAN, MMKD, NHANES, PREVEND, Rancho Bernardo, RCAV, REGARDS, RSIII, SCREAM, SEED, SRR-CKD, Takahata) and studies where the creatinine standardization was not done (AASK, ADVANCE, Aichi, BC CKD, Beijing, CCF, ChinaNS, CHS, CIRCS, CKD-JAC, CRIB, Framingham, IPHS, KHS, MDRD, MESA, MRC, NZDCS, Ohasama, Pima, RENAAL, Sunnybrook, Taiwan MJ, ULSAM, ZODIAC). For those cohorts without standardization, the creatinine levels were reduced by 5%, the calibration factor used to adjust non-standardized MDRD Study samples to IDMS.<sup>2,4</sup> We did not adjust creatinine levels in those studies with unknown standardization status (JMS, Mt Sinai, NIPPON DATA80, NIPPON DATA90, NIPPON DATA2010, PSP-CKD and SMART).

We calculated eGFR using the CKD-EPI equation:  $eGFR_{CKD-EPI} = 141 \times (\text{minimum of standardized serum creatinine [mg/dL]/}\kappa \text{ or } 1)^{\alpha} \times (\text{maximum of standardized serum creatinine [mg/dL]/}\kappa \text{ or } 1)^{-1.209} \times 0.993^{\text{age}} \times (1.018 \text{ if female}) \times (1.159 \text{ if black})$ , where  $\kappa$  is 0.7 if female and 0.9 if male and  $\alpha$  is -0.329 if female and -0.411 if male.<sup>5</sup> The selection of knots for eGFR and ACR was based on clinical thresholds.<sup>6</sup>

### Notes for individual studies:

#### 1. General population cohorts

ChinaNS: Anti-hypertensive medication use was not available.

#### 2. High-risk cohorts

ADVANCE: This study is an intervention study which includes participants with diabetes only.

Geisinger: Due to the requirement of ACR measurement for analyses and the clinical indications that are associated with measurement in this health system dataset, this cohort was categorized as a high-risk cohort for all outcomes except phosphorus and PTH, and as a CKD cohort for outcomes phosphorus and PTH. Urine protein-to-creatinine ratio was converted to urine albumin-to-creatinine ratio by dividing by 2.655 for men and 1.7566 for women.

Maccabi: Due to the requirement of ACR measurement for analyses and the clinical indications that are associated with measurement in this health system dataset, this cohort was categorized as a high-risk cohort. Urine protein-to-creatinine ratio was converted to urine albumin-to-creatinine ratio by dividing by 2.655 for men and 1.7566 for women.

Mt Sinai BioMe: Due to the requirement of ACR measurement for analyses and the clinical indications that are associated with measurement in this health system dataset, this cohort was categorized as a high-risk cohort for all outcomes except phosphorus and PTH, and as a CKD cohort for outcomes phosphorus and PTH. Urine

protein-to-creatinine ratio was converted to urine albumin-to-creatinine ratio by dividing by 2.655 for men and 1.7566 for women.

PIMA: History of CVD was not available.

SCREAM: This cohort does not have data on BMI, smoking and blood pressure. Due to the requirement of ACR measurement for analyses and the clinical indications that are associated with measurement in this health system dataset, this cohort was categorized as a high-risk cohort for all outcomes except phosphorus and PTH, and as a CKD cohort for outcomes phosphorus and PTH.

ZODIAC: Anti-hypertensive medication use was not available.

### 3. CKD cohorts

AASK: Urine protein-to-creatinine ratio was converted to urine albumin-to-creatinine ratio by dividing by 2.655 for men and 1.7566 for women.

CanPREDDICT: This cohort does not have data on smoking. Urine protein-to-creatinine ratio was converted to urine albumin-to-creatinine ratio by dividing by 2.655 for men and 1.7566 for women.

CRIB: History of heart failure was not available. Use of thiazide diuretics, loop diuretics or potassium sparing diuretics was combined. Individual use of each type of diuretics was not available.

Gonryo: This cohort does not have data on smoking.

MASTERPLAN: This study measured urine albumin-to-creatinine ratio in patients with albuminuria in the low range, urine protein-to-creatinine ratio in patients with overt proteinuria. Urine protein-to-creatinine ratio was converted to urine albumin-to-creatinine ratio by dividing by 2.655 for men and 1.7566 for women.

MDRD: Anti-hypertensive medication use was not available. Urine protein-to-creatinine ratio was converted to urine albumin-to-creatinine ratio by dividing by 2.655 for men and 1.7566 for women.

PSP-CKD: Urine protein-to-creatinine ratio was converted to urine albumin-to-creatinine ratio by dividing by 2.655 for men and 1.7566 for women.

RCAV: This cohort does not have data on smoking. Subset of eGFR<60 of this cohort was included in the analysis thus categorized as a CKD cohort.

RENAAL: History of CVD was not available.

SRR-CKD: This cohort does not have data on smoking. There may be some overlap with the SCREAM cohort, which would capture participants with advanced CKD in the region of Stockholm. Use of thiazide diuretics, loop diuretics or potassium sparing diuretics was combined. Individual use of each type of diuretics was not available.

Sunnybrook: This cohort includes patients seen in the nephrology clinics at Sunnybrook Hospital in Toronto, Ontario, Canada with CKD stage 3-5 or proteinuric CKD stage 1-2. Urine protein-to-creatinine ratio was converted to urine albumin-to-creatinine ratio by dividing by 2.655 for men and 1.7566 for women.

**Diabetes Definition Information:**

|                                   |                                                                                                                                                                                                                                                                                                                                                                                                                        |
|-----------------------------------|------------------------------------------------------------------------------------------------------------------------------------------------------------------------------------------------------------------------------------------------------------------------------------------------------------------------------------------------------------------------------------------------------------------------|
| <b>Study</b>                      | <b>Diabetes definition requested:</b> <i>Glycated hemoglobin A1c <math>\geq</math>6.5% or fasting glucose <math>\geq</math>7.0 mmol/L (<math>\geq</math>126 mg/dL) or non-fasting glucose <math>\geq</math>11.1 mmol/L (<math>\geq</math>200 mg/dL) or use of glucose lowering drugs (ADA 2010 criteria). Self-report of physician diagnosed diabetes can be included. Any differences from the above noted below:</i> |
| <b>CKD Cohorts</b>                |                                                                                                                                                                                                                                                                                                                                                                                                                        |
| AASK                              | All participants were free of diabetes as this was an exclusion criterion to have a known history of diabetes.                                                                                                                                                                                                                                                                                                         |
| BC CKD                            |                                                                                                                                                                                                                                                                                                                                                                                                                        |
| CanPREDDICT                       |                                                                                                                                                                                                                                                                                                                                                                                                                        |
| CARE FOR HOME                     | Diabetes was defined as diabetes mellitus reported by the patients or the nephrologist and/or intake of diabetic medication and/or fasting plasma glucose > 126 mg/dl at inclusion.                                                                                                                                                                                                                                    |
| CCF                               | Diabetes was defined using ICD-9 codes: 250.x                                                                                                                                                                                                                                                                                                                                                                          |
| CKD-JAC                           |                                                                                                                                                                                                                                                                                                                                                                                                                        |
| CRIB                              | Diabetes was defined by clinical diagnosis. This study did not collect use of anti-diabetic medications.                                                                                                                                                                                                                                                                                                               |
| GCKD                              | Diabetes was defined as HbA1c $\geq$ 6.5% or use of at least one antidiabetic medication.                                                                                                                                                                                                                                                                                                                              |
| Gonryo                            |                                                                                                                                                                                                                                                                                                                                                                                                                        |
| MASTERPLAN                        | This study did not use non-fasting glucose or glycated hemoglobin to define diabetes.                                                                                                                                                                                                                                                                                                                                  |
| MDRD                              | This study did not collect use of anti-diabetic medications.                                                                                                                                                                                                                                                                                                                                                           |
| MMKD                              | All participants in this study do not have diabetes.                                                                                                                                                                                                                                                                                                                                                                   |
| PSP-CKD                           |                                                                                                                                                                                                                                                                                                                                                                                                                        |
| RCAV                              | Diabetes was defined using ICD-9 codes: 250.x                                                                                                                                                                                                                                                                                                                                                                          |
| RENAAL                            | All participants had type 2 diabetes defined as those patients who were diagnosed after the age of 30, who did not require insulin within six months of diagnosis, and who had no history of diabetic ketoacidosis.                                                                                                                                                                                                    |
| SRR-CKD                           | This study did not collect use of anti-diabetic medications. Diabetes was defined by a clinical diagnosis in medical records.                                                                                                                                                                                                                                                                                          |
| Sunnybrook                        |                                                                                                                                                                                                                                                                                                                                                                                                                        |
| <b>General Population Cohorts</b> |                                                                                                                                                                                                                                                                                                                                                                                                                        |
| Aichi                             |                                                                                                                                                                                                                                                                                                                                                                                                                        |
| ARIC                              |                                                                                                                                                                                                                                                                                                                                                                                                                        |
| AusDiab                           | This study incorporated 2-h plasma glucose after oral glucose tolerance test in addition to the definition for this meta-analysis. This study did not collect use of anti-diabetic medications.                                                                                                                                                                                                                        |
| Beijing                           | This study incorporated 2-h plasma glucose after oral glucose tolerance test in addition to the definition for this meta-analysis. This study did not collect use of anti-diabetic medications.                                                                                                                                                                                                                        |
| BIS                               | Diabetes was defined as glycated hemoglobin A1c $\geq$ 6.5% or use of glucose lowering drugs                                                                                                                                                                                                                                                                                                                           |
| ChinaNS                           | Diabetes was defined by fasting glucose $\geq$ 7.0 mmol/L ( $\geq$ 126 mg/dL) or use of glucose lowering drugs (ADA 2010 criteria) or self-report of physician diagnosed diabetes.                                                                                                                                                                                                                                     |
| CHS                               |                                                                                                                                                                                                                                                                                                                                                                                                                        |
| CIRCS                             |                                                                                                                                                                                                                                                                                                                                                                                                                        |
| ESTHER                            |                                                                                                                                                                                                                                                                                                                                                                                                                        |
| Framingham                        |                                                                                                                                                                                                                                                                                                                                                                                                                        |
| Gubbio                            |                                                                                                                                                                                                                                                                                                                                                                                                                        |
| IPHS                              |                                                                                                                                                                                                                                                                                                                                                                                                                        |
| JMS                               |                                                                                                                                                                                                                                                                                                                                                                                                                        |
| KHS                               |                                                                                                                                                                                                                                                                                                                                                                                                                        |
| MESA                              |                                                                                                                                                                                                                                                                                                                                                                                                                        |

|                          |                                                                                                                                                                                                                                                       |
|--------------------------|-------------------------------------------------------------------------------------------------------------------------------------------------------------------------------------------------------------------------------------------------------|
| MRC                      | Diabetes was classified according to self-report of a medical diagnosis, use of antidiabetic medication, or the presence of a high random blood glucose measurement.                                                                                  |
| NHANES                   |                                                                                                                                                                                                                                                       |
| NIPPON DATA80            | This study did not collect use of anti-diabetic medications.                                                                                                                                                                                          |
| NIPPON DATA90            | This study did not include anti-diabetic medication use to define diabetes.                                                                                                                                                                           |
| NIPPON DATA2010          | This study did not include anti-diabetic medication use to define diabetes.                                                                                                                                                                           |
| Ohasama                  | This study did not collect use of anti-diabetic medications.                                                                                                                                                                                          |
| PREVEND                  |                                                                                                                                                                                                                                                       |
| Rancho Bernardo          | This study incorporated 2-h plasma glucose after oral glucose tolerance test in addition to the definition for this meta-analysis.                                                                                                                    |
| REGARDS                  |                                                                                                                                                                                                                                                       |
| RSIII                    | Type 2 diabetes was defined as a fasting blood glucose concentration of 7.0 mmol/L or higher, a non-fasting blood glucose concentration of 11.1 mmol/L or higher (when fasting samples were unavailable), or the use of blood glucose-lowering drugs. |
| SEED                     |                                                                                                                                                                                                                                                       |
| Taiwan MJ                |                                                                                                                                                                                                                                                       |
| Takahata                 |                                                                                                                                                                                                                                                       |
| ULSAM                    | Diabetes was diagnosed as fasting plasma glucose $\geq 7.0$ mmol/l ( $\geq 126$ mg/dl) or 2-h postload glucose level 11.1 mmol/l ( $\geq 200$ mg/dl) or by the use of oral hypoglycaemic agents or insulin at both examinations.                      |
| <b>High Risk Cohorts</b> |                                                                                                                                                                                                                                                       |
| ADVANCE                  | This study is an intervention study which includes participants with type 2 diabetes diagnosed at the age of 30 or older only.                                                                                                                        |
| Geisinger                | Diabetes was defined using ICD-9 codes: 250.x                                                                                                                                                                                                         |
| Maccabi                  | Diabetes was defined using ICD-9 codes: 250.x                                                                                                                                                                                                         |
| Mt Sinai BioMe           | Diabetes was defined using eMERGE Network's type 2 diabetes algorithm developed at Icahn School of Medicine at Mount Sinai.                                                                                                                           |
| NZDCS                    | This study includes only individuals with type 2 diabetes.                                                                                                                                                                                            |
| Pima                     | This study incorporated 2-h plasma glucose after oral glucose tolerance test in addition to the definition for this meta-analysis. Self reported diagnosis was accepted only if documented in the medical record.                                     |
| SCREAM                   | Diabetes was defined using ICD-10 codes: E10, E11, E13                                                                                                                                                                                                |
| SMART                    |                                                                                                                                                                                                                                                       |
| ZODIAC                   | This study includes only individuals with type 2 diabetes. This study has not collected data on fasting glucose.                                                                                                                                      |

Missing Covariates Table:

| Study                             | Region             | N      | BMI          | Smoking       | DM        | History of CVD |
|-----------------------------------|--------------------|--------|--------------|---------------|-----------|----------------|
| <b>CKD Cohorts</b>                |                    |        |              |               |           |                |
| AASK                              | USA                | 1094   | 0 (0%)       | 0 (0%)        | 0 (0%)    | 0 (0%)         |
| BC CKD                            | Canada             | 11880  | 5463 (46%)   | 0 (0%)        | 0 (0%)    | 0 (0%)         |
| CanPREDDICT                       | Canada             | 2061   | 2025 (98%)   | 2061 (100%)   | 0 (0%)    | 0 (0%)         |
| CARE FOR HOME                     | Germany            | 369    | 348 (94%)    | 24 (7%)       | 229 (62%) | 0 (0%)         |
| CCF                               | USA                | 19249  | 2881 (15%)   | 0 (0%)        | 0 (0%)    | 0 (0%)         |
| CKD-JAC                           | Japan              | 2679   | 254 (9%)     | 342(13%)      | 0 (0%)    | 0 (0%)         |
| CRIB                              | UK                 | 375    | N<5          | 0 (0%)        | 0 (0%)    | 0 (0%)         |
| GCKD                              | Germany            | 5159   | 52 (1%)      | 14 (0%)       | 0 (0%)    | N<5            |
| Geisinger CKD†                    | USA                | 24611  | 2549 (10%)   | 0 (0%)        | 0 (0%)    | 0 (0%)         |
| Gonryo                            | Japan              | 3009   | 1393 (46%)   | 3009 (100%)   | 937 (31%) | 0 (0%)         |
| MASTERPLAN                        | Netherlands        | 670    | 0 (0%)       | 14 (2%)       | N<5       | 9 (1%)         |
| MDRD                              | USA                | 1736   | N<5          | 5 (0%)        | 10 (1%)   | 0 (0%)         |
| MMKD                              | Multi <sup>§</sup> | 202    | 0 (0%)       | 0 (0%)        | 0 (0%)    | 0 (0%)         |
| Mt Sinai BioMe CKD†               | USA                | 3521   | 554 (16%)    | 260 (7%)      | 0 (0%)    | 0 (0%)         |
| PSP-CKD                           | UK                 | 9434   | 3768 (40%)   | 0 (0%)        | 0 (0%)    | 0 (0%)         |
| RCAV                              | USA                | 127812 | 13342 (10%)  | 127812 (100%) | 0 (0%)    | 0 (0%)         |
| RENAAL                            | Multi <sup>¶</sup> | 1512   | 1512 (100%)  | N<5           | 0 (0%)    | 1512 (100%)    |
| SCREAM CKD†                       | Sweden             | 33232  | 33232 (100%) | 33232 (100%)  | 0 (0%)    | 0 (0%)         |
| SRR-CKD                           | Sweden             | 3051   | 544 (18%)    | 3051 (100%)   | 0 (0%)    | 0 (0%)         |
| Sunnybrook                        | Canada             | 3010   | 1838 (61%)   | 0 (0%)        | 0 (0%)    | 0 (0%)         |
| <b>General Population Cohorts</b> |                    |        |              |               |           |                |
| Aichi                             | Japan              | 4987   | 0 (0%)       | 89 (2%)       | 0 (0%)    | 0 (0%)         |
| ARIC*                             | USA                | 11889  | 34 (0%)      | 436 (4%)      | 17 (0%)   | 281 (2%)       |
| AusDiab*                          | Australia          | 11198  | 170 (2%)     | 178 (2%)      | 69 (1%)   | 32 (0%)        |
| Beijing                           | China              | 1533   | 0 (0%)       | N<5           | 61 (4%)   | N<5            |
| BIS                               | Germany            | 2055   | N<5          | 0 (0%)        | 0 (0%)    | 0 (0%)         |
| ChinaNS*                          | China              | 46810  | 228 (0%)     | 35 (0%)       | 44 (0%)   | 4766 (10%)     |
| CHS*                              | USA                | 2984   | 48 (2%)      | 55 (2%)       | 0 (0%)    | 0 (0%)         |
| CIRCS                             | Japan              | 11916  | N<5          | 8 (0%)        | 0 (0%)    | 0 (0%)         |
| ESTHER*                           | Germany            | 9744   | 10 (0%)      | 284 (3%)      | 0 (0%)    | 10 (0%)        |
| Framingham*                       | USA                | 2956   | 0 (0%)       | 0 (0%)        | 0 (0%)    | 0 (0%)         |
| Gubbio                            | Italy              | 1684   | 0 (0%)       | 0 (0%)        | 0 (0%)    | 0 (0%)         |
| IPHS                              | Japan              | 97769  | 437 (0%)     | 0 (0%)        | 0 (0%)    | 0 (0%)         |
| JMS                               | Japan              | 5124   | 6 (0%)       | 0 (0%)        | 0 (0%)    | 0 (0%)         |
| KHS                               | Korean             | 243779 | 12080 (1%)   | 0 (0%)        | 0 (0%)    | 0 (0%)         |
| MESA*                             | USA                | 6796   | 0 (0%)       | 34 (1%)       | 0 (0%)    | 0 (0%)         |
| MRC                               | UK                 | 12367  | 765 (6%)     | 31 (0%)       | 0 (0%)    | 96 (1%)        |
| NHANES                            | USA                | 56017  | 540 (1%)     | 2741 (5%)     | 69 (0%)   | 3343 (6%)      |
| NIPPON DATA80*                    | Japan              | 10382  | N<5          | 15 (0%)       | N<5       | 0 (0%)         |
| NIPPON DATA90                     | Japan              | 7612   | N<5          | 0 (0%)        | 0 (0%)    | 0 (0%)         |
| NIPPON DATA2010                   | Japan              | 2749   | N<5          | 8 (0%)        | 6 (0%)    | 0 (0%)         |
| Ohasama                           | Japan              | 3300   | 46 (1%)      | 641 (19%)     | 89 (3%)   | 0 (0%)         |
| PREVEND                           | Netherlands        | 8060   | 74 (1%)      | 0 (0%)        | 274 (3%)  | 0 (0%)         |
| Rancho Bernardo                   | USA                | 1484   | 7 (0%)       | 8 (1%)        | 0 (0%)    | 0 (0%)         |
| REGARDS                           | USA                | 27727  | 79 (0%)      | 101 (0%)      | 137 (0%)  | 8 (0%)         |
| RSIII                             | Netherlands        | 3519   | 67 (2%)      | 10 (0%)       | 0 (0%)    | 0 (0%)         |
| SEED*                             | Singapore          | 7028   | 7 (0%)       | N<5           | 51 (1%)   | 5 (0%)         |
| Taiwan MJ                         | Taiwan             | 501704 | 149 (0%)     | 0 (0%)        | 0 (0%)    | 0 (0%)         |

|                                                                                                                                                                                                                                                                                                                    |             |        |               |               |          |             |
|--------------------------------------------------------------------------------------------------------------------------------------------------------------------------------------------------------------------------------------------------------------------------------------------------------------------|-------------|--------|---------------|---------------|----------|-------------|
| Takahata                                                                                                                                                                                                                                                                                                           | Japan       | 3524   | 0 (0%)        | N<5           | 115 (3%) | 0 (0%)      |
| ULSAM                                                                                                                                                                                                                                                                                                              | Sweden      | 1123   | N<5           | 32 (3%)       | 0 (0%)   | 0 (0%)      |
| <b>High Risk Cohorts</b>                                                                                                                                                                                                                                                                                           |             |        |               |               |          |             |
| ADVANCE                                                                                                                                                                                                                                                                                                            | Multi**     | 11033  | 22 (0%)       | 13 (0%)       | 0 (0%)   | 0 (0%)      |
| Geisinger                                                                                                                                                                                                                                                                                                          | USA         | 65051  | 10497 (16%)   | 0 (0%)        | 0 (0%)   | 0 (0%)      |
| Maccabi                                                                                                                                                                                                                                                                                                            | Israel      | 264255 | 125292 (47%)  | 0 (0%)        | 0 (0%)   | 0 (0%)      |
| Mt Sinai BioMe                                                                                                                                                                                                                                                                                                     | USA         | 8109   | 1642 (20%)    | 540 (7%)      | 7 (0%)   | 7 (0%)      |
| NZDCS*                                                                                                                                                                                                                                                                                                             | New Zealand | 31622  | 604 (2%)      | 163 (1%)      | 0 (0%)   | 0 (0%)      |
| Pima                                                                                                                                                                                                                                                                                                               | USA         | 5074   | 37 (1%)       | 2119 (42%)    | 0 (0%)   | 5074 (100%) |
| SCREAM                                                                                                                                                                                                                                                                                                             | Sweden      | 260047 | 260047 (100%) | 260047 (100%) | 0 (0%)   | 0 (0%)      |
| SMART                                                                                                                                                                                                                                                                                                              | Netherlands | 3691   | 6 (0%)        | 34 (1%)       | 0 (0%)   | 0 (0%)      |
| ZODIAC                                                                                                                                                                                                                                                                                                             | Netherlands | 1632   | 3 (0%)        | 18 (1%)       | 0 (0%)   | 0 (0%)      |
| * Studies with only hypertension                                                                                                                                                                                                                                                                                   |             |        |               |               |          |             |
| † CKD population from three administrative high risk cohorts, not included in the total N                                                                                                                                                                                                                          |             |        |               |               |          |             |
| § Participants are from Austria, Germany, and Italy                                                                                                                                                                                                                                                                |             |        |               |               |          |             |
| ¶ Participants are from Argentina, Austria, Brazil, Canada, Chile, China, Costa Rica, Czech Republic, Denmark, France, Germany, Hungary, Israel, Italy, Japan, Malaysia, Mexico, Netherlands, New Zealand, Peru, Portugal, Russia, Singapore, Slovakia, Spain, United Kingdom, United States of America, Venezuela |             |        |               |               |          |             |
| ** Participants are from Australia, Canada, China, Czech Republic, Estonia, France, Germany, Hungary, India, Ireland, Italy, Lithuania, Malaysia, Netherlands, New Zealand, Philippines, Poland, Russia, Slovakia, United Kingdom                                                                                  |             |        |               |               |          |             |

## References

1. Matsushita K, van der Velde M, Astor BC, et al. Association of estimated glomerular filtration rate and albuminuria with all-cause and cardiovascular mortality in general population cohorts: a collaborative meta-analysis. *Lancet*. 2010;375(9731):2073-2081.
2. Matsushita K, Mahmoodi BK, Woodward M, et al. Comparison of risk prediction using the CKD-EPI equation and the MDRD study equation for estimated glomerular filtration rate. *JAMA*. 2012;307(18):1941-1951.
3. Hallan SI, Matsushita K, Sang Y, et al. Age and Association of Kidney Measures With Mortality and Endstage Renal Disease. *JAMA*. 2012;308(22):2349-2360.
4. Levey AS, Coresh J, Greene T, et al. Expressing the Modification of Diet in Renal Disease Study Equation for Estimating Glomerular Filtration Rate with Standardized Serum Creatinine Values. *Clin. Chem*. 2007;53(4):766-772.
5. Levey AS, Stevens LA, Schmid CH, et al. A new equation to estimate glomerular filtration rate. *Ann. Intern. Med*. 2009;150(9):604-612.
6. Kidney Disease: Improving Global Outcomes (KDIGO) CKD Work Group. KDIGO 2012 Clinical Practice Guideline for the Evaluation and Management of Chronic Kidney Disease. *Kidney International Supplements*. 2013;3(1):1-150.
