# Supplementary material
Source: PubMed Central journal article supplement (PMC6348050)
Supplement: NIHMS1506109-supplement-27.pdf [file NIHMS1506109-supplement-27.pdf]

**Table S1. Proportion with anemia and mean value of hemoglobin and hematocrit, by cohort**

| Study                     | N             | % Anemia           | Hemoglobin, mean (SD) | Hematocrit, mean (SD) | Medication use availability            |                          |                            |
|---------------------------|---------------|--------------------|-----------------------|-----------------------|----------------------------------------|--------------------------|----------------------------|
|                           |               |                    |                       |                       | % Erythropoietin stimulating agent use | % IV iron supplement use | % oral iron supplement use |
| <b>CKD Cohorts</b>        |               |                    |                       |                       |                                        |                          |                            |
| BC CKD                    | 11655         | 6280 (54%)         | 12 (2)                | 37 (5)                | NA                                     | NA                       | NA                         |
| CanPREDDICT               | 2045          | 1206 (59%)         | 12 (2)                | 36 (5)                | 393 (19%)                              | 477 (23%)                | 46 (2%)                    |
| CARE FOR HOME             | 371           | 71 (19%)           | 14 (2)                | 41 (4)                | 7 (2%)                                 | 4 (1%)                   | 6 (2%)                     |
| CCF                       | 12696         | 5307 (42%)         | 13 (2)                | 39 (5)                | NA                                     | NA                       | NA                         |
| CKD-JAC                   | 2639          | 1659 (63%)         | 12 (2)                | 36 (5)                | 350 (13%)                              | 21 (1%)                  | 215 (8%)                   |
| CRIB                      | 364           | 218 (60%)          | 12 (2)                | NA                    | 35 (10%)                               | NA                       | NA                         |
| GCKD                      | 5127          | 1217 (24%)         | 14 (2)                | NA                    | 123 (2%)                               | NA                       | NA                         |
| Geisinger CKD†            | 19008         | 7696 (40%)         | 13 (2)                | 33 (6)                | 35 (0%)                                | 30 (0%)                  | 1293 (7%)                  |
| Gonryo                    | 3044          | 1113 (37%)         | 13 (2)                | 38 (6)                | 200 (7%)                               | NA                       | NA                         |
| MASTERPLAN                | 670           | 236 (35%)          | 13 (2)                | 39 (37)               | 57 (9%)                                | NA                       | 2 (6%)                     |
| MDRD                      | 1719          | 602 (35%)          | 13 (2)                | 38 (4)                | NA                                     | NA                       | NA                         |
| MMKD                      | 202           | 58 (29%)           | 13 (2)                | 40 (6)                | NA                                     | NA                       | NA                         |
| Mt Sinai BioMe CKD†       | 1931          | 1103 (57%)         | 12 (2)                | 36 (6)                | 69 (4%)                                | 9 (0%)                   | 275 (14%)                  |
| PSP-CKD                   | 2223          | 762 (34%)          | 13 (2)                | NA                    | 36 (2%)                                | NA                       | NA                         |
| RCAV                      | 108044        | 43385 (40%)        | 13 (2)                | NA                    | 421 (0%)                               | 20 (0%)                  | 4048 (4%)                  |
| RENAAL                    | 1510          | 791 (52%)          | 13 (2)                | 38 (6)                | NA                                     | NA                       | NA                         |
| SCREAM CKD†               | 30209         | 10291 (34%)        | 13 (2)                | NA                    | 935 (3%)                               | 186 (1%)                 | 1407 (5%)                  |
| SRR-CKD                   | 3032          | 1841 (61%)         | 12 (2)                | NA                    | 623 (21%)                              | 105 (3%)                 | 346 (11%)                  |
| Sunnybrook                | 2822          | 1048 (37%)         | 13 (2)                | NA                    | NA                                     | NA                       | NA                         |
| <b>Subtotal</b>           | <b>209311</b> | <b>84882 (41%)</b> | <b>13 (2)</b>         | <b>36 (7)</b>         | <b>3287 (2%)</b>                       | <b>853 (1%)</b>          | <b>7638 (5%)</b>           |
| <b>General Population</b> |               |                    |                       |                       |                                        |                          |                            |
| Aichi                     | 4987          | 285 (6%)           | 15 (1)                | NA                    | NA                                     | NA                       | NA                         |
| BIS                       | 1995          | 354 (18%)          | 14 (1)                | 41 (4)                | 4 (0%)                                 | 1 (0%)                   | 24 (1%)                    |
| CIRCS                     | 11475         | 1422 (12%)         | 14 (2)                | 41 (5)                | NA                                     | NA                       | NA                         |
| Gubbio                    | 1684          | 33 (2%)            | 15 (1)                | 43 (4)                | 0 (0%)                                 | 0 (0%)                   | 34 (2%)                    |
| IPHS                      | 97740         | 11378 (12%)        | 14 (1)                | 41 (4)                | NA                                     | NA                       | NA                         |
| JMS                       | 5091          | 689 (14%)          | 14 (2)                | 42 (4)                | NA                                     | NA                       | NA                         |
| KHS                       | 243716        | 16043 (7%)         | 14 (2)                | 43 (5)                | NA                                     | NA                       | NA                         |
| MRC                       | 12101         | 2372 (20%)         | 13 (1)                | NA                    | NA                                     | NA                       | NA                         |
| NHANES                    | 51434         | 4928 (10%)         | 14 (2)                | 42 (4)                | NA                                     | NA                       | NA                         |

|                                                   |                |                     |               |               |                  |                 |                  |
|---------------------------------------------------|----------------|---------------------|---------------|---------------|------------------|-----------------|------------------|
| NIPPON DATA90                                     | 7612           | 1048 (14%)          | 14 (2)        | 44 (5)        | NA               | NA              | NA               |
| NIPPON DATA2010                                   | 2730           | 338 (12%)           | 14 (2)        | 42 (4)        | NA               | NA              | NA               |
| Ohasama                                           | 1926           | 389 (20%)           | 13 (1)        | 40 (4)        | NA               | NA              | NA               |
| REGARDS                                           | 19070          | 2657 (14%)          | 14 (1)        | 40 (4)        | NA               | NA              | NA               |
| RSIII                                             | 3525           | 160 (5%)            | 14 (1)        | 45 (4)        | NA               | NA              | NA               |
| Taiwan MJ                                         | 501646         | 36932 (7%)          | 14 (2)        | 42 (4)        | NA               | NA              | NA               |
| Takahata                                          | 3523           | 406 (12%)           | 14 (1)        | 41 (4)        | NA               | NA              | NA               |
| <b>Subtotal</b>                                   | <b>970255</b>  | <b>79434 (8%)</b>   | <b>14 (2)</b> | <b>42 (5)</b> | <b>4 (0%)</b>    | <b>1 (0%)</b>   | <b>58 (2%)</b>   |
| <b>High Risk Cohorts</b>                          |                |                     |               |               |                  |                 |                  |
| Geisinger                                         | 46072          | 10189 (22%)         | 14 (2)        | 35 (6)        | 41 (0%)          | 37 (0%)         | 1909 (4%)        |
| Maccabi                                           | 253333         | 33080 (13%)         | 14 (1)        | 42 (4)        | 326 (0%)         | 2 (0%)          | 2828 (1%)        |
| Mt Sinai BioMe                                    | 4346           | 1764 (41%)          | 13 (2)        | 38 (5)        | 72 (2%)          | 8 (0%)          | 462 (11%)        |
| Pima                                              | 5058           | 506 (10%)           | NA            | 42 (5)        | NA               | NA              | NA               |
| SCREAM                                            | 232861         | 27342 (12%)         | 14 (1)        | NA            | 999 (0%)         | 264 (0%)        | 3411 (1%)        |
| SMART                                             | 3684           | 378 (10%)           | 14 (1)        | 42 (4)        | NA               | NA              | NA               |
| <b>Subtotal</b>                                   | <b>545354</b>  | <b>73256 (13%)</b>  | <b>14 (2)</b> | <b>41 (5)</b> | <b>1438 (0%)</b> | <b>311 (0%)</b> | <b>8610 (2%)</b> |
| <b>General population/<br/>high risk subtotal</b> | <b>1515609</b> | <b>152690 (10%)</b> | <b>14 (2)</b> | <b>42 (5)</b> | <b>1442 (0%)</b> | <b>312 (0%)</b> | <b>8668 (2%)</b> |

**Total† 1673772**

Anemia: Hemoglobin <13g/dL for male, <12g/dL for female; Hematocrit <39% for male, <36% for female

† CKD population from three administrative high risk cohorts, not included in the total N
