# Supplementary material
Source: PubMed Central journal article supplement (PMC6348050)
Supplement: NIHMS1506109-supplement-28.pdf [file NIHMS1506109-supplement-28.pdf]

**Table S2. Proportion with hyperkalemia and hypokalemia and mean value of serum potassium, by cohort**

| Study               | N             | % Hyperkalemia     | % Hypokalemia    | Potassium mean (SD) | % RAAS inhibitor use | % ACE inhibitor use | % ARB use          | % Renin inhibitor use | % K sparing diuretics use | % Other diuretics use | % Loop diuretics use | % thiazide diuretics use | % Kayexalate use |
|---------------------|---------------|--------------------|------------------|---------------------|----------------------|---------------------|--------------------|-----------------------|---------------------------|-----------------------|----------------------|--------------------------|------------------|
| <b>CKD Cohorts</b>  |               |                    |                  |                     |                      |                     |                    |                       |                           |                       |                      |                          |                  |
| AASK                | 1066          | 91 (9%)            | 92 (9%)          | 4.2 (0.6)           | 620 (59%)            | 611 (58%)           | 12 (1%)            | NA                    | NA                        | NA                    | NA                   | NA                       | NA               |
| BC CKD              | 11785         | 2463 (21%)         | 193 (2%)         | 4.6 (0.6)           | NA                   | NA                  | NA                 | NA                    | NA                        | NA                    | NA                   | NA                       | NA               |
| CanPREDDICT         | 2052          | 396 (19%)          | 49 (2%)          | 4.6 (0.6)           | 1463 (71%)           | 871 (42%)           | 761 (37%)          | 8 (0%)                | 122 (6%)                  | 1394 (68%)            | 917 (45%)            | 621 (30%)                | 113 (6%)         |
| CCF                 | 17498         | 1917 (11%)         | 621 (4%)         | 4.4 (0.6)           | NA                   | NA                  | NA                 | NA                    | NA                        | NA                    | NA                   | NA                       | NA               |
| CKD-JAC             | 2640          | 594 (22%)          | 36 (1%)          | 4.6 (0.6)           | 2170 (82%)           | 726 (28%)           | 1967 (75%)         | 0 (0%)                | 156 (6%)                  | 749 (28%)             | 638 (24%)            | 211 (8%)                 | 14 (1%)          |
| CRIB                | 373           | 70 (19%)           | 9 (2%)           | 4.6 (0.6)           | 133 (36%)            | 117 (31%)           | 16 (6%)            | NA                    | NA                        | 151 (40%)             | NA                   | NA                       | NA               |
| Geisinger CKD†      | 24417         | 2945 (12%)         | 555 (2%)         | 4.5 (0.5)           | 12072 (49%)          | 9084 (37%)          | 3326 (14%)         | 22 (0%)               | 1771 (7%)                 | 11313 (46%)           | 5886 (24%)           | 6287 (26%)               | 55 (0%)          |
| MASTERPLAN          | 670           | 89 (13%)           | 23 (3%)          | 4.4 (0.6)           | 545 (81%)            | 343 (51%)           | 254 (38%)          | NA                    | 24 (4%)                   | 331 (49%)             | 119 (18%)            | 216 (32%)                | NA               |
| MDRD                | 830           | 85 (10%)           | 40 (5%)          | 4.4 (0.6)           | NA                   | NA                  | NA                 | NA                    | NA                        | NA                    | NA                   | NA                       | NA               |
| Mt Sinai BioMe CKD† | 3518          | 454 (13%)          | 128 (4%)         | 4.4 (0.8)           | 1740 (49%)           | 1151 (33%)          | 665 (19%)          | 8 (0%)                | 183 (5%)                  | 1284 (36%)            | 493 (14%)            | 841 (24%)                | 144 (4%)         |
| PSP-CKD             | 9405          | 1718 (18%)         | 105 (1%)         | 4.6 (0.5)           | 6064 (64%)           | 4450 (47%)          | 1844 (20%)         | NA                    | 523 (6%)                  | 4197 (45%)            | 2306 (25%)           | 2013 (21%)               | NA               |
| RCAV                | 124843        | 12778 (10%)        | 3528 (3%)        | 4.4 (0.5)           | 56445 (45%)          | 46162 (37%)         | 11515 (9%)         | 9 (0%)                | 8051 (6%)                 | 41031 (33%)           | 22212 (18%)          | 20864 (17%)              | 223 (0%)         |
| RENAAL              | 1513          | 386 (26%)          | 22 (1%)          | 4.7 (0.6)           | 737 (49%)            | 737 (49%)           |                    | NA                    | NA                        | 910 (60%)             | NA                   | NA                       | NA               |
| SCREAM CKD†         | 29383         | 1639 (6%)          | 1060 (4%)        | 4.3 (0.5)           | 13599 (46%)          | 7630 (26%)          | 6730 (23%)         | NA                    | 2462 (8%)                 | 10426 (35%)           | 8932 (30%)           | 1702 (6%)                | 322 (1%)         |
| SRR-CKD             | 2591          | 363 (14%)          | 85 (3%)          | 4.4 (0.6)           | 1003 (39%)           | 0 (0%)              | 1002 (39%)         | 1 (0%)                | NA                        | 1801 (70%)            | NA                   | NA                       | NA               |
| Sunnybrook          | 2965          | 361 (12%)          | 99 (3%)          | 4.4 (0.5)           | NA                   | NA                  | NA                 | NA                    | NA                        | NA                    | NA                   | NA                       | NA               |
| <b>Subtotal</b>     | <b>235549</b> | <b>26348 (11%)</b> | <b>6645 (3%)</b> | <b>4.4 (0.5)</b>    | <b>97256 (48%)</b>   | <b>72906 (36%)</b>  | <b>28129 (14%)</b> | <b>48 (0%)</b>        | <b>13316 (7%)</b>         | <b>73587 (37%)</b>    | <b>41503 (21%)</b>   | <b>32755 (17%)</b>       | <b>871 (0%)</b>  |
|                     |               |                    |                  |                     |                      |                     |                    |                       |                           |                       |                      |                          |                  |

|                                                       |               |                   |                   |                  |                     |                     |                    |                |                   |                    |                   |                   |                 |                 |
|-------------------------------------------------------|---------------|-------------------|-------------------|------------------|---------------------|---------------------|--------------------|----------------|-------------------|--------------------|-------------------|-------------------|-----------------|-----------------|
| <b>General Population</b>                             |               |                   |                   |                  |                     |                     |                    |                |                   |                    |                   |                   |                 |                 |
| Beijing                                               | 1530          | 168 (11%)         | 4 (0%)            | 4.5 (0.5)        | NA                  | NA                  | NA                 | NA             | NA                | NA                 | NA                | NA                | NA              | NA              |
| CIRCS                                                 | 8034          | 146 (2%)          | 66 (1%)           | 4.2 (0.4)        | NA                  | NA                  | NA                 | NA             | NA                | NA                 | NA                | NA                | NA              | NA              |
| Gubbio                                                | 1684          | 20 (1%)           | 36 (2%)           | 4.2 (0.4)        | 91 (5%)             | 91 (5%)             | NA                 | NA             | 59 (4%)           | 109 (6%)           | 9 (1%)            | 100 (6%)          | NA              | NA              |
| KHS                                                   | 108185        | 1047 (1%)         | 653 (1%)          | 4.2 (0.6)        | NA                  | NA                  | NA                 | NA             | NA                | NA                 | NA                | NA                | NA              | NA              |
| MRC                                                   | 11840         | 1081 (9%)         | 328 (3%)          | 4.4 (0.6)        | NA                  | NA                  | NA                 | NA             | NA                | NA                 | NA                | NA                | NA              | NA              |
| NHANES                                                | 57208         | 405 (1%)          | 2340 (4%)         | 4.0 (0.3)        | 5983 (10%)          | 4325 (8%)           | 1730 (4%)          | 14 (0%)        | 1347 (2%)         | 5498 (10%)         | 1548 (3%)         | 4100 (7%)         | NA              | NA              |
| PREVEND                                               | 7319          | 204 (3%)          | 47 (1%)           | 4.4 (0.7)        | 334 (5%)            | 289 (5%)            | 47 (1%)            | NA             | 13 (0%)           | 203 (3%)           | 57 (1%)           | 150 (2%)          | NA              | NA              |
| Rancho Bernardo                                       | 1484          | 45 (3%)           | 17 (1%)           | 4.3 (0.4)        | NA                  | NA                  | NA                 | NA             | 4 (0%)            | 256 (17%)          | 57 (4%)           | 203 (14%)         | NA              | NA              |
| TaiwanMJ                                              | 159268        | 1077 (1%)         | 2896 (2%)         | 4.1 (0.3)        | NA                  | NA                  | NA                 | NA             | NA                | NA                 | NA                | NA                | NA              | NA              |
| Takahata                                              | 1923          | 102 (5%)          | 23 (1%)           | 4.3 (0.4)        | NA                  | NA                  | NA                 | NA             | NA                | NA                 | NA                | NA                | NA              | NA              |
| <b>Subtotal</b>                                       | <b>358475</b> | <b>4295 (1%)</b>  | <b>6410 (2%)</b>  | <b>4.1 (0.5)</b> | <b>6408 (10%)</b>   | <b>4705 (7%)</b>    | <b>1777 (4%)</b>   | <b>14 (0%)</b> | <b>1423 (2%)</b>  | <b>6066 (9%)</b>   | <b>1671 (3%)</b>  | <b>4553 (7%)</b>  | <b>0 (0%)</b>   | <b>0 (0%)</b>   |
| <b>High Risk Cohorts</b>                              |               |                   |                   |                  |                     |                     |                    |                |                   |                    |                   |                   |                 |                 |
| ADVANCE                                               | 11033         | 843 (8%)          | 183 (2%)          | 4.4 (0.5)        |                     | 4490 (43%)          | 566 (5%)           | NA             | NA                | 1536 (14%)         | NA                | 1536 (14%)        | NA              | NA              |
| Geisinger                                             | 64503         | 3727 (6%)         | 1298 (2%)         | 4.3 (0.4)        | 23817 (37%)         | 18824 (29%)         | 5434 (8%)          | 28 (0%)        | 2687 (4%)         | 18889 (29%)        | 7422 (12%)        | 12336 (19%)       | 51 (0%)         | NA              |
| Maccabi                                               | 246712        | 12681 (5%)        | 830 (0%)          | 4.4 (0.4)        | 67908 (28%)         | 45960 (19%)         | 23442 (10%)        | 7 (0%)         | 2518 (1%)         | 18829 (8%)         | 5184 (2%)         | 13841 (6%)        | 85 (0%)         | NA              |
| Mt Sinai BioMe                                        | 8044          | 519 (6%)          | 293 (4%)          | 4.3 (0.7)        | 3126 (39%)          | 2190 (27%)          | 1032 (13%)         | 10 (0%)        | 246 (3%)          | 2141 (27%)         | 602 (7%)          | 1604 (20%)        | 141 (2%)        | NA              |
| SCREAM                                                | 208611        | 2369 (1%)         | 7089 (3%)         | 4.1 (0.4)        | 51217 (25%)         | 29420 (14%)         | 23293 (11%)        | 1 (0%)         | 4652 (2%)         | 22516 (11%)        | 16036 (8%)        | 6702 (3%)         | 308 (0%)        | NA              |
| ZODIAC                                                | 1153          | 55 (5%)           | 7 (1%)            | 4.4 (0.4)        | NA                  | NA                  | NA                 | NA             | NA                | NA                 | NA                | NA                | NA              | NA              |
| <b>Subtotal</b>                                       | <b>540056</b> | <b>20192 (4%)</b> | <b>9699 (2%)</b>  | <b>4.3 (0.4)</b> | <b>151351 (28%)</b> | <b>101364 (19%)</b> | <b>53912 (10%)</b> | <b>46 (0%)</b> | <b>10136 (2%)</b> | <b>63911 (12%)</b> | <b>29342 (6%)</b> | <b>36019 (7%)</b> | <b>585 (0%)</b> | <b>585 (0%)</b> |
| <b>General population/<br/>high risk<br/>subtotal</b> | <b>898531</b> | <b>24487 (3%)</b> | <b>16109 (2%)</b> | <b>4.2 (0.4)</b> | <b>157759 (26%)</b> | <b>106069 (18%)</b> | <b>55689 (9%)</b>  | <b>60 (0%)</b> | <b>11559 (2%)</b> | <b>71173 (12%)</b> | <b>31013 (5%)</b> | <b>40572 (7%)</b> | <b>585 (0%)</b> | <b>585 (0%)</b> |

|                                                                                                                                                                      |                |  |  |  |  |  |  |  |  |  |  |  |  |
|----------------------------------------------------------------------------------------------------------------------------------------------------------------------|----------------|--|--|--|--|--|--|--|--|--|--|--|--|
|                                                                                                                                                                      |                |  |  |  |  |  |  |  |  |  |  |  |  |
| <b>Total†</b>                                                                                                                                                        | <b>1076762</b> |  |  |  |  |  |  |  |  |  |  |  |  |
| Hyperkalemia: Potassium >5 mmol/L<br>Hypokalemia: Potassium <3.5 mmol/L<br>† CKD population from three administrative high risk cohorts, not included in the total N |                |  |  |  |  |  |  |  |  |  |  |  |  |
