# Supplementary material
Source: PubMed Central journal article supplement (PMC6348050)
Supplement: NIHMS1506109-supplement-29.pdf [file NIHMS1506109-supplement-29.pdf]

**Table S3. Proportion with acidosis and mean value of serum bicarbonate, by cohort**

| Study                                                                                     | N             | % Acidosis        | Bicarbonate, mean (SD) |
|-------------------------------------------------------------------------------------------|---------------|-------------------|------------------------|
| <b>CKD Cohorts</b>                                                                        |               |                   |                        |
| AASK                                                                                      | 984           | 100 (10%)         | 25 (3)                 |
| BC CKD                                                                                    | 11162         | 1300 (12%)        | 26 (4)                 |
| CanPREDDICT                                                                               | 1822          | 260 (14%)         | 25 (4)                 |
| CCF                                                                                       | 16218         | 1665 (10%)        | 26 (3)                 |
| CRIB                                                                                      | 324           | 151 (47%)         | 24 (4)                 |
| Geisinger CKD†                                                                            | 24358         | 1302 (5%)         | 27 (3)                 |
| MASTERPLAN                                                                                | 668           | 124 (19%)         | 25 (4)                 |
| MDRD                                                                                      | 1725          | 549 (32%)         | 23 (4)                 |
| Mt Sinai BioMe CKD†                                                                       | 3520          | 591 (17%)         | 25 (4)                 |
| PSP-CKD                                                                                   | 228           | 36 (16%)          | 26 (4)                 |
| RCAV                                                                                      | 119959        | 6908 (6%)         | 27 (3)                 |
| SCREAM CKD†                                                                               | 7011          | 1366 (19%)        | 24 (4)                 |
| SRR-CKD                                                                                   | 1613          | 469 (29%)         | 23 (3)                 |
| Sunnybrook                                                                                | 2748          | 264 (10%)         | 26 (4)                 |
| <b>Subtotal</b>                                                                           | <b>192340</b> | <b>15086 (8%)</b> | <b>26 (4)</b>          |
| <b>General Population</b>                                                                 |               |                   |                        |
| NHANES                                                                                    | 41359         | 3654 (9%)         | 25 (2)                 |
| <b>High Risk Cohorts</b>                                                                  |               |                   |                        |
| Geisinger                                                                                 | 64341         | 1896 (3%)         | 27 (3)                 |
| Mt Sinai BioMe                                                                            | 8047          | 794 (10%)         | 26 (3)                 |
| SCREAM                                                                                    | 12001         | 1494 (12%)        | 25 (3)                 |
| <b>General population/ high risk subtotal</b>                                             | <b>125748</b> | <b>7840 (6%)</b>  | <b>26 (3)</b>          |
| <b>Total†</b>                                                                             | <b>283199</b> |                   |                        |
| Acidosis: Bicarbonate <22 mmol/L                                                          |               |                   |                        |
| † CKD population from three administrative high risk cohorts, not included in the total N |               |                   |                        |
